# Supplementary material
Source: Research Square preprint supplement (doi:10.21203/rs.3.rs-9256951/v1)

**Suppl. Fig.1** **Ferroptosis induces the selective secretion of methylmalonic acid in HK-2 cells.** (A) MMA levels in the cell culture supernatants of HK-2 cells stimulated for 24 h with erastin, RSL3, TSZ (TNF-α + SM-164 + Z-VAD-FMK), or TS (TNF-α + SM-164). The data are presented as the mean ± SD. *****p* < 0.0001, ****p* < 0.001, ***p* < 0.01, **p* < 0.05.

**Suppl. Fig.2 Ferroptosis-derived metabolites promote M1 macrophage polarization.** (A) Schematic diagram of the experimental groups. HK-2 cells were treated with 2 μM RSL3 or 5 μM erastin for 24 h, after which the culture supernatants were collected. To remove high-molecular-weight proteins, the supernatants were filtered through Amicon® Ultra centrifugal filter units (10 kDa MWCO; Millipore, USA). The retained ferroptosis-associated metabolites were subsequently used to stimulate RAW264.7 macrophages. (B) Flow cytometry analysis of M1 marker expression (F4/80 and TNF-α) in macrophages (n = 3). The data are presented as the mean ± SD. *****p* < 0.0001, ****p* < 0.001, ***p* < 0.01, **p* < 0.05.

**Suppl. Fig.3 Renal macrophage depletion by clodronate liposomes.** (A) Schematic diagram of the experimental groups. (B) Flow cytometry analysis of renal F4/80⁺CD11b⁺ macrophages to assess depletion efficiency.

**Suppl. Fig.4 BMDMs are recruited to the kidney following RIRI.** (A) Flow cytometry analysis of the macrophage surface markers F4/80 and CD11b on BMDMs, showing successful induction in vitro. (B) Immunofluorescence staining showing successful labeling of BMDMs with PKH-26 in vitro. (C) Representative immunofluorescence images showing the recruitment of PKH-26–labeled BMDMs into kidneys from different groups following IRI. Nuclei were counterstained with DAPI (blue). Scale bars: 50 μm. The quantification of PKH-26⁺-positive BMDMs is shown on the right.

**Suppl. Fig.1**

**
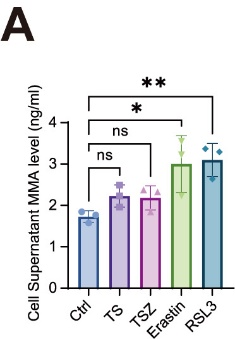
**

**Suppl. Fig.2**

**
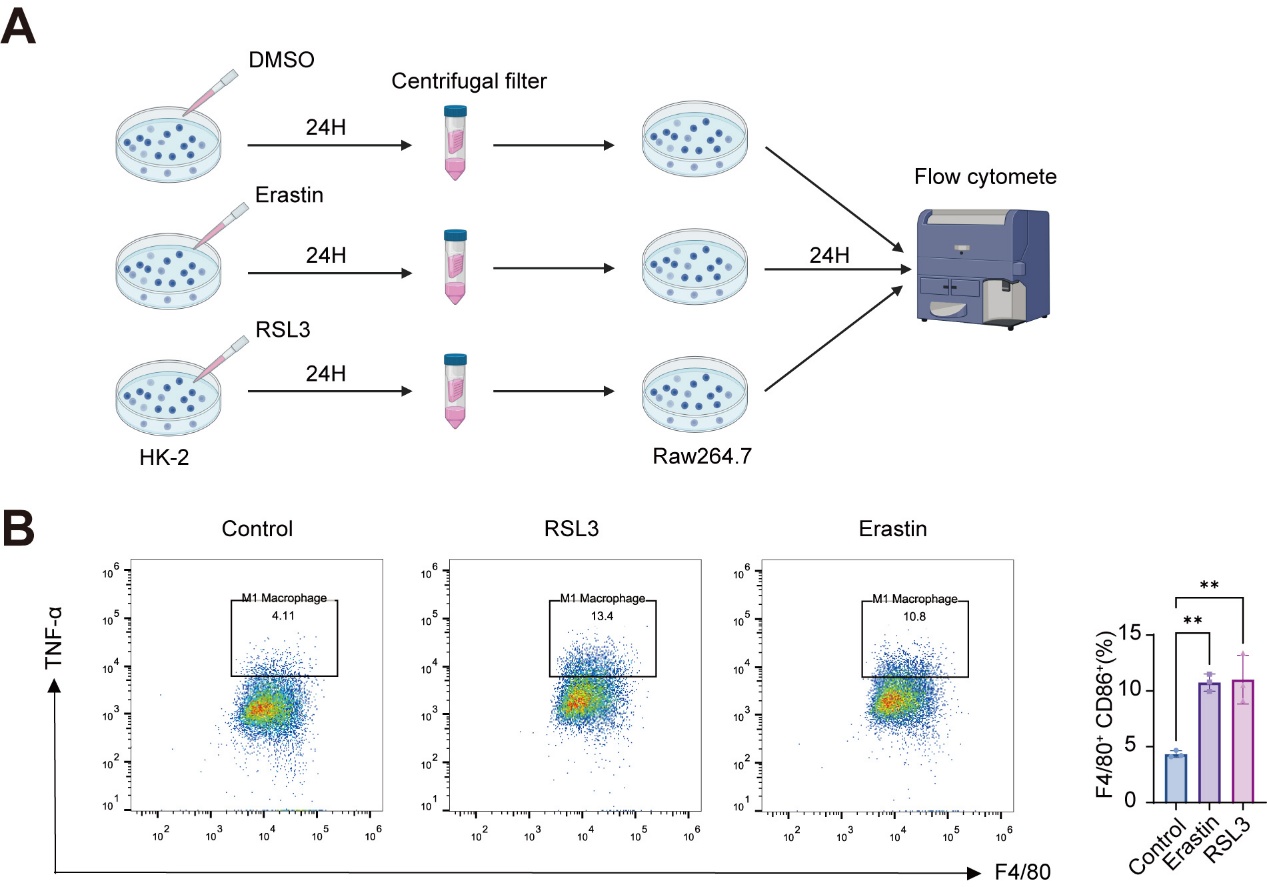
**

**Suppl. Fig.3**

**
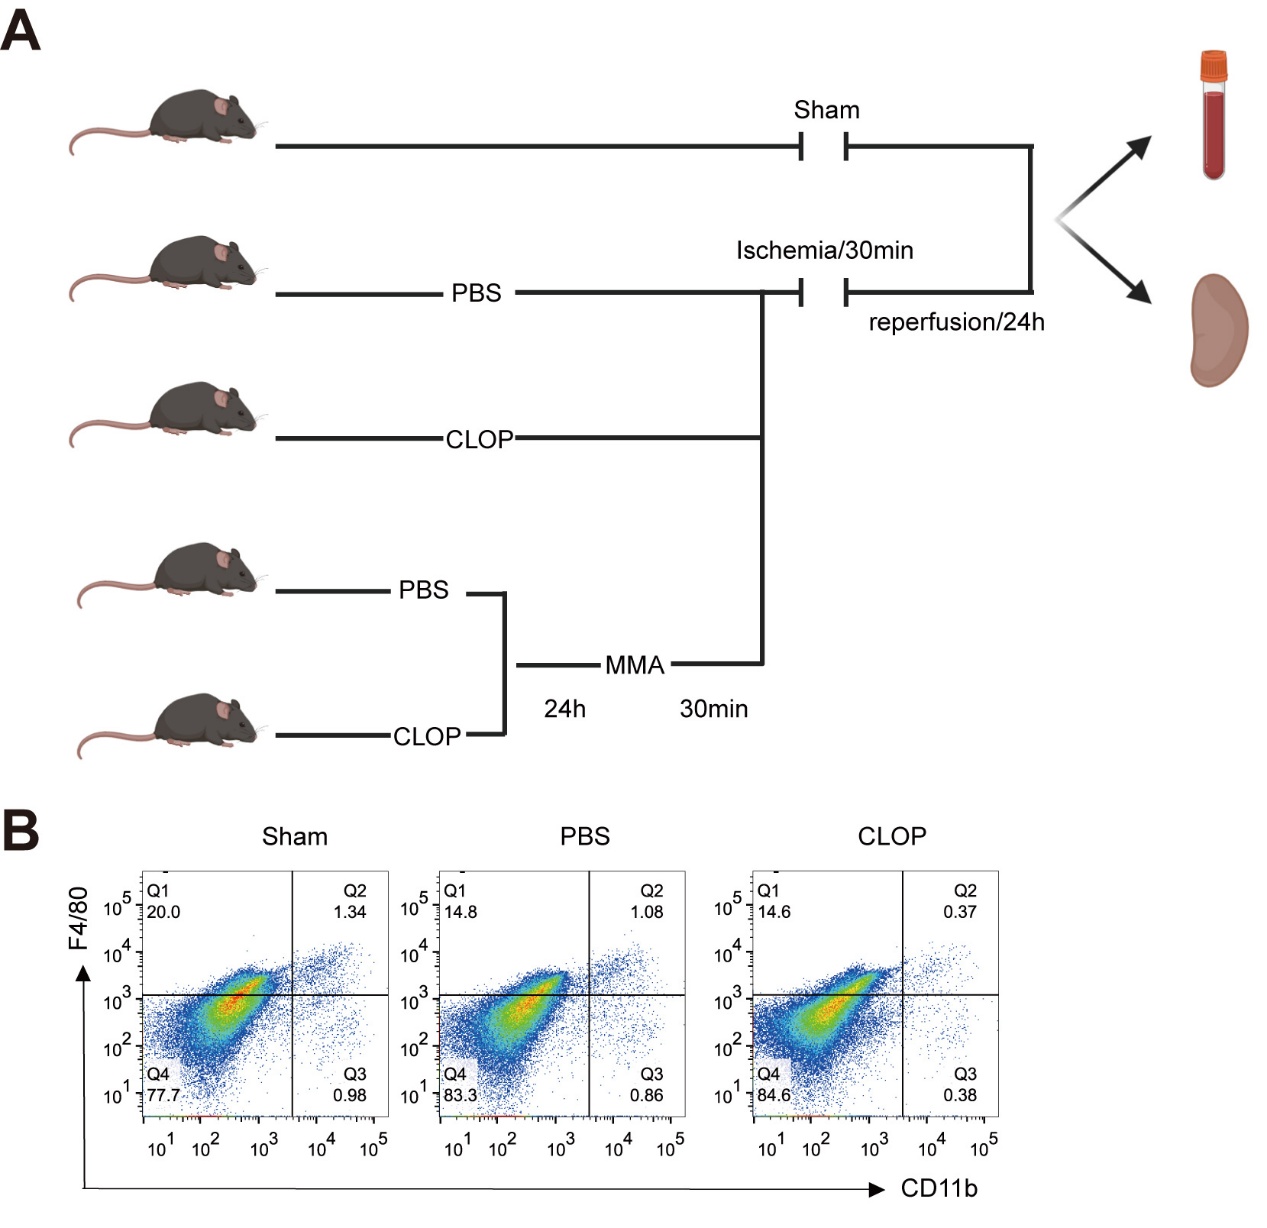
**

**Suppl. Fig.4**


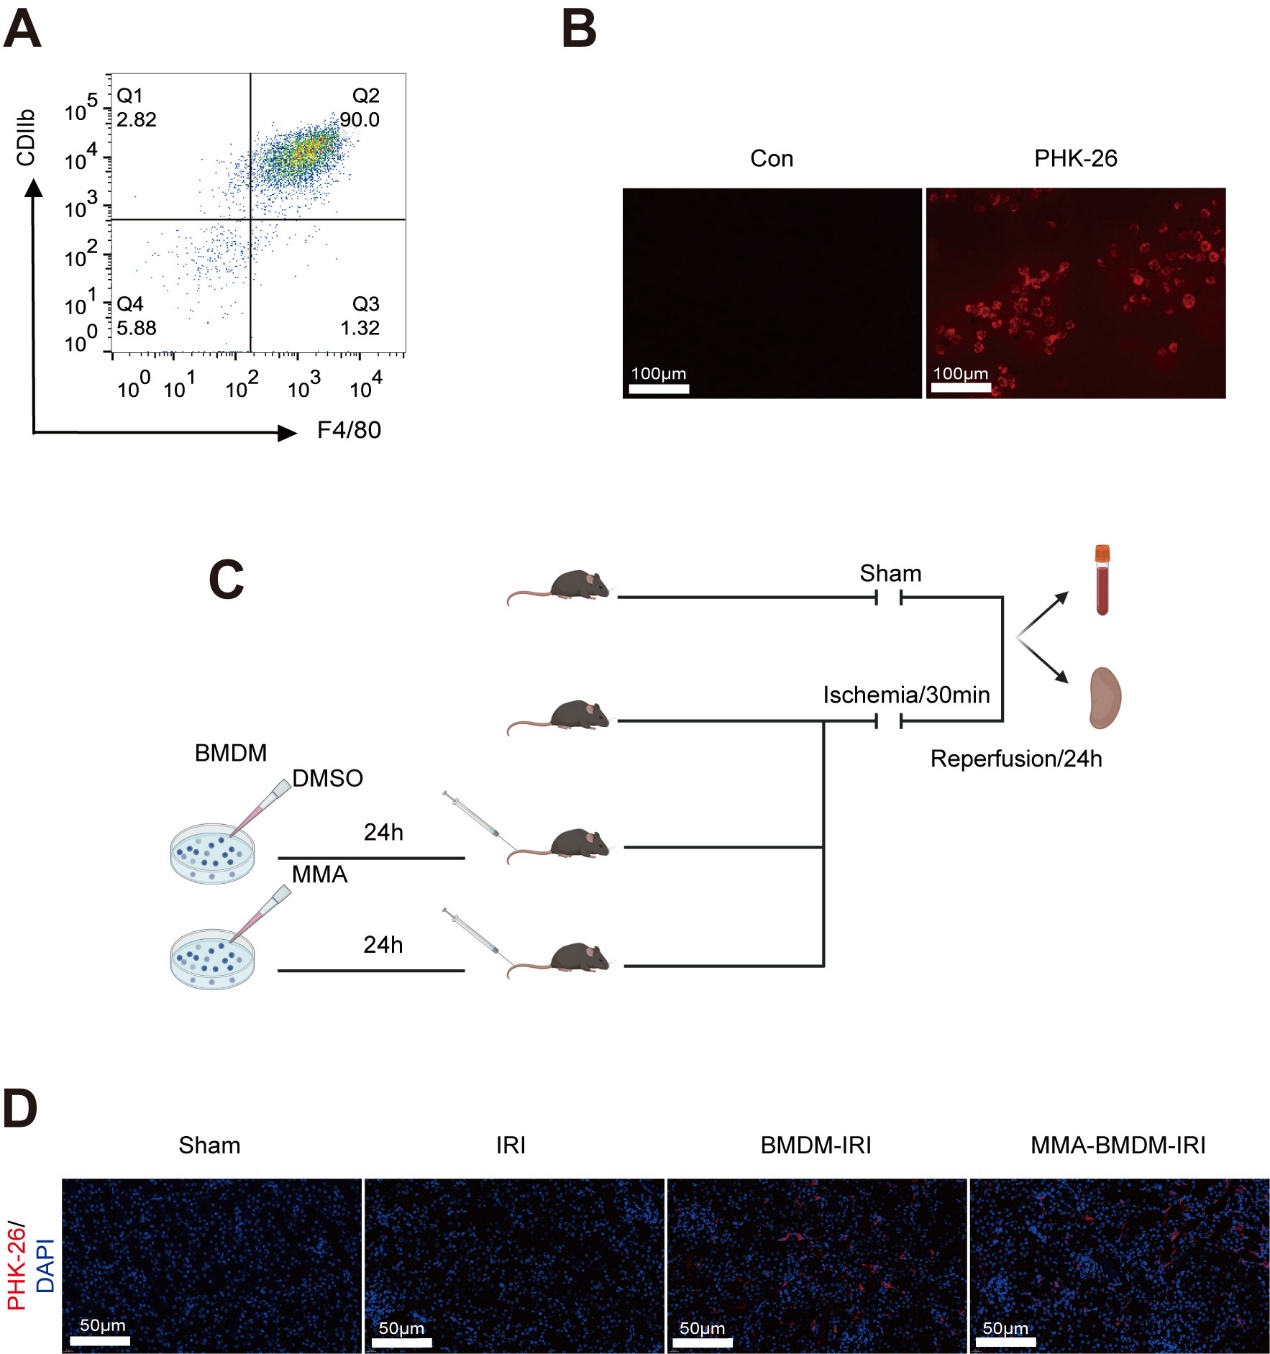

Supplement: Supplementary file 1 [file 22f5854ec4210b3ac86d998d.docx]
